# Supplementary material
Source: HighWire-hosted journal article supplement (https://bmjopen.bmj.com/content/15/3/e090832)
Supplement: inline-supplementary-material-6 [file inline-supplementary-material-6.pdf]

### Risk Assessment

|                                                                                                                                                                                |                                     |               |
|--------------------------------------------------------------------------------------------------------------------------------------------------------------------------------|-------------------------------------|---------------|
| <b>Overall assessment of the risk of harm or ill health after control measures have been implemented:</b><br><i>(Tick the highest risk indicated in the Risk column below)</i> | <input checked="" type="checkbox"/> | <b>LOW</b>    |
|                                                                                                                                                                                | <input type="checkbox"/>            | <b>MEDIUM</b> |
|                                                                                                                                                                                | <input type="checkbox"/>            | <b>HIGH</b>   |
| <b>Other risk assessments and/or COSHH related to this activity:</b> <i>(include links to relevant risk assessments, including risk assessments provided by visitors)</i>      |                                     |               |

| <b>What are the hazards?</b><br><i>(What could cause harm?)</i>         | <b>Who might be harmed and how?</b><br><i>(People types and types of injury)</i> | <b>Control Measures</b><br><i>(i.e., What has been implemented to reduce the likelihood and impact of harm?)</i>                                                                                                                                                                                                                                                                                                                                                                        | <b>Risk</b><br><i>(See matrix below)</i> | <b>Is any further action needed?</b><br><i>(i.e., controls to be implemented to reduce the risk further)</i> |
|-------------------------------------------------------------------------|----------------------------------------------------------------------------------|-----------------------------------------------------------------------------------------------------------------------------------------------------------------------------------------------------------------------------------------------------------------------------------------------------------------------------------------------------------------------------------------------------------------------------------------------------------------------------------------|------------------------------------------|--------------------------------------------------------------------------------------------------------------|
| Dizziness or light-headedness in participants when practicing breathing | COPD patients                                                                    | <ul style="list-style-type: none"> <li>Be reminded in the animated exercise video of the developed software to put a chair or other leaning items available nearby before conducting the intervention</li> <li>Be educated to immediately stop exercising and return to normal breathing when participants feel uncomfortable</li> <li>Highly clinically experienced nurse will provide timely guidance and response measures to participants via telephone during the trial</li> </ul> | <b>Low</b>                               | No                                                                                                           |

| <b>What are the hazards?</b><br><i>(What could cause harm?)</i> | <b>Who might be harmed and how?</b><br><i>(People types and types of injury)</i> | <b>Control Measures</b><br><i>(i.e., What has been implemented to reduce the likelihood and impact of harm?)</i>                                                                                                                                                                                                                                                                                                                                                             | <b>Risk</b><br><i>(See matrix below)</i> | <b>Is any further action needed?</b><br><i>(i.e., controls to be implemented to reduce the risk further)</i> |
|-----------------------------------------------------------------|----------------------------------------------------------------------------------|------------------------------------------------------------------------------------------------------------------------------------------------------------------------------------------------------------------------------------------------------------------------------------------------------------------------------------------------------------------------------------------------------------------------------------------------------------------------------|------------------------------------------|--------------------------------------------------------------------------------------------------------------|
| Data breach of confidentiality                                  | Participants                                                                     | <ul style="list-style-type: none"> <li>Individual accounts and passwords will be created to avoid data breach</li> <li>Participants' authentication account names on the developed platform will only be numbers determined based on the order of patient enrolment. Therefore, the real identity of the participant cannot be identified through the data on the participant's platform</li> </ul>                                                                          | <b>Low</b>                               | No                                                                                                           |
| Researcher safety                                               | Researcher Houqiang Huang                                                        | <ul style="list-style-type: none"> <li>All interactions with participants will be within the hospital in rooms where assistance will be available at all times should it be required. No meetings with participants will take place at times when the researcher is the sole individual in the hospital clinic environment. Safe and security staff in the hospital will be on standby during the face-to-face communication for Houqiang Huang with participants</li> </ul> | <b>Low</b>                               | No                                                                                                           |

| What are the hazards?<br><i>(What could cause harm?)</i>    | Who might be harmed and how?<br><i>(People types and types of injury)</i> | Control Measures<br><i>(i.e., What has been implemented to reduce the likelihood and impact of harm?)</i>                                                                                                                                                                                                                                                                                                                                                                                                                                                                                                                                                                                                                                                                                                                          | Risk<br><i>(See matrix below)</i> | Is any further action needed?<br><i>(i.e., controls to be implemented to reduce the risk further)</i> |
|-------------------------------------------------------------|---------------------------------------------------------------------------|------------------------------------------------------------------------------------------------------------------------------------------------------------------------------------------------------------------------------------------------------------------------------------------------------------------------------------------------------------------------------------------------------------------------------------------------------------------------------------------------------------------------------------------------------------------------------------------------------------------------------------------------------------------------------------------------------------------------------------------------------------------------------------------------------------------------------------|-----------------------------------|-------------------------------------------------------------------------------------------------------|
| Risk of inappropriate comments on the peer support platform | Participants                                                              | <ul style="list-style-type: none"> <li>• Participants will be asked not to post comments containing personal data, medical recommendations, and negative comments.</li> <li>• The high-performance Java sensitive word tool framework based on DFA (Deterministic Finite Automation) algorithm will serve as a filter for screening participant comments, and those comments with inappropriate comments will be automatically filtered out and will not be posted on the platform.</li> <li>• Houqiang Huang will monitor all comments, and those comments that have personal data, medical recommendations, and negative comments will be deleted.</li> </ul> <p>The participant information sheet and consent forms include information and request participant agreement to conduct themselves responsibly on the platform</p> | <b>Low</b>                        | No                                                                                                    |

| What are the hazards?<br><i>(What could cause harm?)</i>                                      | Who might be harmed and how?<br><i>(People types and types of injury)</i> | Control Measures<br><i>(i.e., What has been implemented to reduce the likelihood and impact of harm?)</i>                                                                                                                                                                                                                                                                                                                                                                                                                                                                                                                                                                                                                                                                                                                                                                                                                 | Risk<br><i>(See matrix below)</i> | Is any further action needed?<br><i>(i.e., controls to be implemented to reduce the risk further)</i> |
|-----------------------------------------------------------------------------------------------|---------------------------------------------------------------------------|---------------------------------------------------------------------------------------------------------------------------------------------------------------------------------------------------------------------------------------------------------------------------------------------------------------------------------------------------------------------------------------------------------------------------------------------------------------------------------------------------------------------------------------------------------------------------------------------------------------------------------------------------------------------------------------------------------------------------------------------------------------------------------------------------------------------------------------------------------------------------------------------------------------------------|-----------------------------------|-------------------------------------------------------------------------------------------------------|
| Risk of participants personal information being shared by others on the peer support platform | Participants                                                              | <ul style="list-style-type: none"> <li>Participants will be asked not to post comments containing personal information and should respect the confidentiality of other participants by not sharing any of the conversations on the platform with others.</li> <li>The high-performance Java sensitive word tool framework based on DFA (Deterministic Finite Automaton) algorithm will serve as a filter for screening comments containing personal information such as telephone numbers, names, and those comments with personal information will be automatically filtered out and will not be posted on the platform.</li> <li>Houqiang Huang will monitor all comments, and those comments that contain personal data will be deleted.</li> </ul> <p>The participant information sheet and consent forms include information and request participant agreement to conduct themselves responsibly on the platform</p> | <b>Low</b>                        | No                                                                                                    |

| Assess the likelihood of the incident occurring and the severity of the consequence. |                                        | Severity                                                                |                                                                                          |                                                                              |
|--------------------------------------------------------------------------------------|----------------------------------------|-------------------------------------------------------------------------|------------------------------------------------------------------------------------------|------------------------------------------------------------------------------|
|                                                                                      |                                        | Harm or injury is trivial or minor<br><i>(e.g., minor cut, bruises)</i> | Harm or injury is moderate<br><i>(e.g., injury or ill health requires time off work)</i> | Harm or injury is substantial<br><i>(e.g., hospital treatment, fatality)</i> |
| Likelihood of occurring                                                              | Unlikely/never happened before         | LOW                                                                     | LOW                                                                                      | MEDIUM                                                                       |
|                                                                                      | Likely/possible/has happened before    | LOW                                                                     | MEDIUM                                                                                   | HIGH                                                                         |
|                                                                                      | More likely/near certain/happens often | MEDIUM                                                                  | HIGH                                                                                     | HIGH                                                                         |

| Risk Rating | Action                                                                                        |
|-------------|-----------------------------------------------------------------------------------------------|
| LOW         | No further action but ensure controls are maintained and reviewed                             |
| MEDIUM      | Look to improve at next review or in specified timescale, or if there is a significant change |
| HIGH        | Stop the activity and take immediate action to maintain existing controls rigorously          |
